# Supplementary material for: Design of tetraphenyl silsesquioxane based covalent-organic frameworks as hydrogen storage materials
Source: Royal Society of Chemistry journal article supplement (doi:10.1039/c4ta02692f), 2014-01-01
Supplement: c4ta02692f1.pdf [file c4ta02692f1.pdf]

## ***Supporting Information***

### Design of tetraphenyl silsesquioxane based covalent-organic frameworks as hydrogen storage materials

Xiao-Dong Li,<sup>\*1</sup> Hua-Ping Zang,<sup>2</sup> Jun-Tao Wang,<sup>1</sup> Jun-Fei Wang<sup>1</sup> and Hong Zhang<sup>\*3</sup>

<sup>1</sup>*College of Science, Henan University of Technology, Zhengzhou 450001, China*

<sup>2</sup>*School of Physics and Engineering, Zhengzhou University, Zhengzhou, Henan 450001, China*

<sup>3</sup>*College of Physical Science and Technology, Sichuan University, Chengdu 610065, China*

The supporting information provides the space group symmetries and coordinates of four designed sil-COF frameworks (Table S1-S4) and the entire heat of adsorption at all the adsorption points simulated (Table S5).

---

\*Authors to whom correspondence should be addressed, E-mail: xiaodonglihaut@163.com and hongzhang@scu.edu.cn

**Table S1** The space group symmetries and coordinates of four designed sil-COF-1.

---

Name: sil-COF-1  
Space group symmetry: I-43m  
a = b = c = 33.466597  
alpha = betha = gamma = 90°

---

| Atom | x       | y       | z       |
|------|---------|---------|---------|
| O1   | 0.45339 | 0.28026 | 0.62504 |
| Si2  | 0.46185 | 0.24191 | 0.65258 |
| B3   | 0.42832 | 0.48890 | 0.46797 |
| O4   | 0.43498 | 0.45560 | 0.49465 |
| C5   | 0.51415 | 0.33692 | 0.53916 |
| C6   | 0.50860 | 0.36974 | 0.51348 |
| C7   | 0.48510 | 0.32720 | 0.56826 |
| C8   | 0.47409 | 0.39386 | 0.51643 |
| C9   | 0.44534 | 0.38446 | 0.54587 |
| C10  | 0.45067 | 0.35149 | 0.57141 |
| H11  | 0.53966 | 0.32025 | 0.53606 |
| H12  | 0.53012 | 0.37577 | 0.49262 |
| H13  | 0.42005 | 0.40137 | 0.54896 |
| H14  | 0.42897 | 0.34572 | 0.59217 |
| O15  | 0.50000 | 0.25000 | 0.56946 |

---

**Table S2** The space group symmetries and coordinates of four designed sil-COF-2.

---

Name : sil-COF-2  
Space group symmetry : P-43m  
a = b = c = 21.684387  
alpha = betha = gamma = 90°

---

| Atom | x       | y       | z       |
|------|---------|---------|---------|
| C1   | 0.14060 | 0.61381 | 0.06127 |
| C2   | 0.17262 | 0.66021 | 0.09341 |
| H3   | 0.15897 | 0.59802 | 0.02072 |
| H4   | 0.21312 | 0.67630 | 0.07530 |
| Si5  | 0.95745 | 0.54251 | 0.95745 |
| C6   | 0.08387 | 0.59096 | 0.08387 |
| C7   | 0.14865 | 0.68509 | 0.14865 |
| O8   | 0.91403 | 0.50000 | 0.00000 |
| O9   | 0.00000 | 0.58538 | 0.00000 |
| B10  | 0.73849 | 0.82075 | 0.82075 |
| O11  | 0.76623 | 0.76623 | 0.84723 |

---

**Table S3** The space group symmetries and coordinates of four designed sil-COF-3.

---

Name : sil-COF-3  
Space group symmetry : I-43m  
a = b = c = 49.524858  
alpha = betha = gamma = 90°

---

| Atom | x       | y       | z       |
|------|---------|---------|---------|
| B1   | 0.37058 | 0.53350 | 0.47781 |
| O2   | 0.38860 | 0.53391 | 0.45493 |
| C3   | 0.58804 | 0.46560 | 0.31769 |
| C4   | 0.56773 | 0.50957 | 0.30941 |
| C5   | 0.55049 | 0.50578 | 0.33168 |
| C6   | 0.55187 | 0.48190 | 0.34716 |
| C7   | 0.57086 | 0.46190 | 0.34001 |
| H8   | 0.60147 | 0.45055 | 0.31317 |
| H9   | 0.57234 | 0.44442 | 0.35093 |
| H10  | 0.56614 | 0.52720 | 0.29869 |
| H11  | 0.53695 | 0.52065 | 0.33644 |
| O12  | 0.37888 | 0.51230 | 0.49597 |
| C13  | 0.43811 | 0.46927 | 0.47668 |
| C14  | 0.44553 | 0.48405 | 0.45280 |
| C15  | 0.40054 | 0.50097 | 0.48391 |
| C16  | 0.40642 | 0.51387 | 0.45982 |
| C17  | 0.42848 | 0.50573 | 0.44425 |
| C18  | 0.41606 | 0.47907 | 0.49255 |
| H19  | 0.43130 | 0.51609 | 0.42676 |
| H20  | 0.41060 | 0.47086 | 0.51056 |
| C21  | 0.58664 | 0.48947 | 0.30206 |
| Si22 | 0.49427 | 0.27571 | 0.60635 |
| O23  | 0.46829 | 0.27009 | 0.62498 |
| O24  | 0.50000 | 0.25000 | 0.66256 |

---

**Table S4** The space group symmetries and coordinates of four designed sil-COF-4.

---

Name: sil-COF-4  
Space group symmetry: P-43m  
a = b = c = 32.215251  
alpha = betha = gamma = 90°

---

| Atom | x       | y       | z       |
|------|---------|---------|---------|
| O1   | 0.32517 | 0.16221 | 0.88929 |
| C2   | 0.17108 | 0.20270 | 0.76587 |
| C3   | 0.16927 | 0.29500 | 0.86107 |
| C4   | 0.20109 | 0.26562 | 0.86026 |
| H5   | 0.22210 | 0.26824 | 0.88358 |
| H6   | 0.14531 | 0.61608 | 0.05260 |
| H7   | 0.10731 | 0.56549 | 0.01422 |
| C8   | 0.11775 | 0.60556 | 0.06438 |
| C9   | 0.09527 | 0.57564 | 0.04185 |
| C10  | 0.10216 | 0.62132 | 0.10216 |
| C11  | 0.05677 | 0.56071 | 0.05677 |
| Si12 | 0.97138 | 0.52867 | 0.97138 |
| B13  | 0.34484 | 0.12439 | 0.87561 |
| O14  | 0.94220 | 0.50000 | 0.00000 |
| O15  | 0.00000 | 0.55760 | 0.00000 |

---

**Table S5** The isosteric heat of adsorption (kJ/mol) in four sil-COFs under pressure from 0.1–100 bar at both 77 K and 298 K.

| Pressure<br>(bar) | sil-COF-1 |      | sil-COF-2 |      | sil-COF-3 |      | sil-COF-4 |      |
|-------------------|-----------|------|-----------|------|-----------|------|-----------|------|
|                   | 77        | 298  | 77        | 298  | 77        | 298  | 77        | 298  |
| 0.1               | 3.68      | 4.14 | 3.64      | 4.03 | 3.21      | 3.37 | 4.15      | 2.97 |
| 0.5               | 3.61      | 3.59 | 4.76      | 3.90 | 2.84      | 3.85 | 4.15      | 3.48 |
| 1                 | 4.11      | 3.71 | 4.68      | 4.98 | 3.53      | 2.70 | 3.14      | 3.07 |
| 2.5               | 3.69      | 3.96 | 4.82      | 4.15 | 2.77      | 3.86 | 2.97      | 3.27 |
| 5                 | 3.78      | 4.48 | 2.93      | 4.27 | 1.99      | 2.93 | 2.44      | 3.00 |
| 7.5               | 3.50      | 4.10 | 2.95      | 3.79 | 3.26      | 3.04 | 2.57      | 3.33 |
| 10                | 3.01      | 4.19 | 3.00      | 3.78 | 2.09      | 3.16 | 2.60      | 3.85 |
| 20                | 3.10      | 4.86 | 2.63      | 3.81 | 2.57      | 3.31 | 3.22      | 2.47 |
| 30                | 3.47      | 4.05 | 3.15      | 4.18 | 1.95      | 4.45 | 2.45      | 3.38 |
| 40                | 3.93      | 4.24 | 2.78      | 4.83 | 2.64      | 3.96 | 2.46      | 3.51 |
| 50                | 3.14      | 4.68 | 3.93      | 3.97 | 2.94      | 3.85 | 2.03      | 3.53 |
| 60                | 5.20      | 3.88 | 2.89      | 3.77 | 3.04      | 3.52 | 2.20      | 3.10 |
| 70                | 4.39      | 4.47 | 4.19      | 4.72 | 2.62      | 3.67 | 2.25      | 3.95 |
| 80                | 3.39      | 4.98 | 3.48      | 3.94 | 2.47      | 2.77 | 2.29      | 3.51 |
| 90                | 3.39      | 4.78 | 4.46      | 4.67 | 2.28      | 3.63 | 2.17      | 3.50 |
| 100               | 4.06      | 4.45 | 3.83      | 4.09 | 3.18      | 3.43 | 2.44      | 3.30 |
| average           | 3.72      | 4.28 | 3.63      | 4.18 | 2.71      | 3.47 | 2.72      | 3.33 |
